# Supplementary material for: NANOG Expression as a Responsive Biomarker during Treatment with Hedgehog Signal Inhibitor in Acute Myeloid Leukemia
Source: PubMed Central journal article supplement (PMC5372502; doi:10.3390/ijms18030486), 2017-02-24
Supplement: ijms-18-00486-s001.pdf [file ijms-18-00486-s001.pdf]

# Supplementary Material: NANOG Expression as a Responsive Biomarker during Treatment with Hedgehog Signal Inhibitor in Acute Myeloid Leukemia

Seiji Kakiuchi, Yosuke Minami, Yoshiharu Miyata, Yu Mizutani, Hideaki Goto, Shinichiro Kawamoto, Kimikazu Yakushijin, Keiji Kurata, Hiroshi Matsuoka and Hironobu Minami

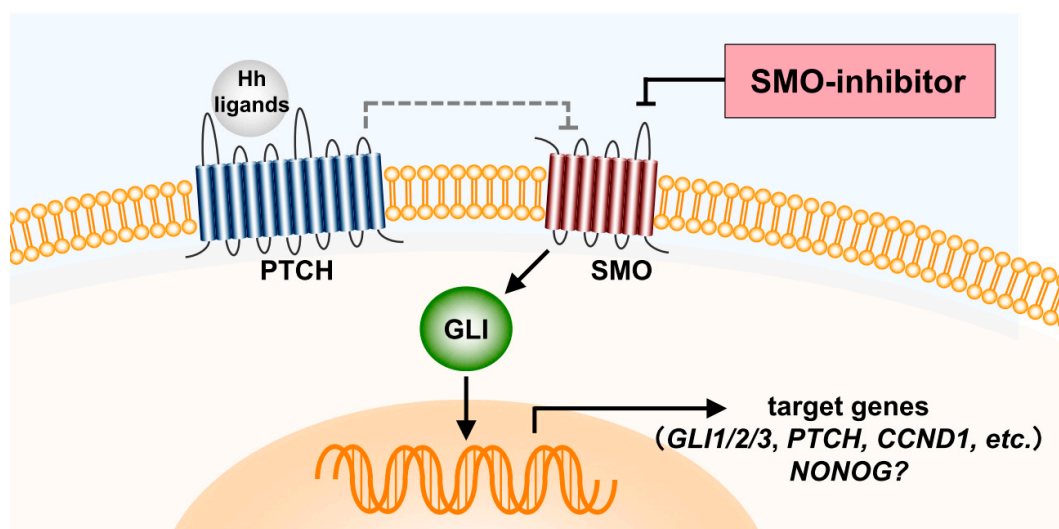

Figure S1. A schema of the Hh signaling pathway and smoothed (SMO) inhibitor.

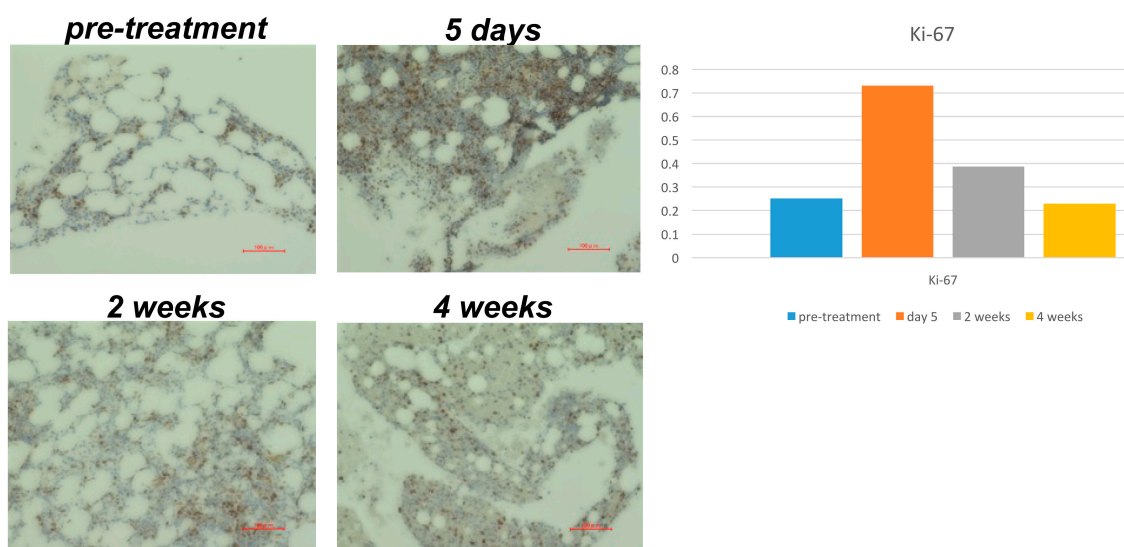

Figure S2. Ki-67 immunostaining of bone marrow samples derived from AML patients in treatment with PF-913. Stained cells were photographed using a 10× objective lens on an HS All-in-one Fluorescence Microscope BZ-X710 (Keyence, Osaka, Japan), and then analyzed with BZ-X Analyzer software 1.3.0.3 (Keyence). Scale bar indicates 100 μm. AML cells taken from patients on day 5 were stained more strongly than control cells. The proportion of stained cells within samples decreased on week 2 and 4.

a

| Gene Description                                     | Expression value (Day 15) | Expression value (Day 0) | Ratio     |
|------------------------------------------------------|---------------------------|--------------------------|-----------|
| cyclin-dependent kinase 6                            | 546.7675                  | 690.3224                 | 0.7920466 |
| cyclin-dependent kinase 17                           | 258.5784                  | 326.6813                 | 0.7915311 |
| cyclin A1                                            | 132.0147                  | 168.6279                 | 0.7828758 |
| cyclin K                                             | 241.9618                  | 314.6301                 | 0.7690358 |
| cyclin D binding myb-like transcription factor 1     | 456.7834                  | 639.9221                 | 0.7138109 |
| cyclin-dependent kinase-like 2 (CDC2-related kinase) | 11.16589                  | 16.88885                 | 0.6611397 |

b

| Gene Description                     | Expression value (day 15) | Expression value (day 0) | Ratio     |
|--------------------------------------|---------------------------|--------------------------|-----------|
| cyclin B2                            | 79.40307                  | 99.57973                 | 0.7973819 |
| cyclin F                             | 73.74847                  | 94.77658                 | 0.7781297 |
| cyclin-dependent kinase 8            | 74.08309                  | 96.19574                 | 0.7701286 |
| cyclin-dependent kinase inhibitor 2C | 27.17594                  | 36.00911                 | 0.7546962 |
| cyclin D-type binding-protein 1      | 134.4164                  | 185.2599                 | 0.7255558 |
| cyclin C                             | 31.47397                  | 44.08308                 | 0.7139694 |
| cyclin E1                            | 72.57008                  | 102.3358                 | 0.7091368 |
| cyclin A2                            | 226.0831                  | 345.4463                 | 0.6544667 |
| cyclin B1                            | 60.95027                  | 94.3652                  | 0.6458977 |
| cyclin-dependent kinase inhibitor 3  | 81.78414                  | 132.761                  | 0.6160253 |
| cyclin-dependent kinase 1            | 78.22661                  | 155.9832                 | 0.5015066 |

c

| Gene Description                                           | Expression value (day 15) | Expression value (day 0) | Ratio     |
|------------------------------------------------------------|---------------------------|--------------------------|-----------|
| cyclin-dependent kinase 2 interacting protein              | 32.69574                  | 42.3108                  | 0.7727516 |
| cyclin O                                                   | 12.18868                  | 15.79771                 | 0.7715473 |
| cyclin-dependent kinase 1                                  | 118.5653                  | 154.0527                 | 0.7696412 |
| cyclin-dependent kinase inhibitor 3                        | 79.39215                  | 105.1104                 | 0.7553215 |
| cyclin-dependent kinase-like 5                             | 12.32727                  | 16.62435                 | 0.7415189 |
| cyclin B2                                                  | 141.8313                  | 203.3475                 | 0.6974824 |
| cyclin-dependent kinase 11A // cyclin-dependent kinase 11B | 54.31515                  | 82.37109                 | 0.6593958 |
| cyclin M2                                                  | 71.35423                  | 121.1865                 | 0.5887969 |
| cyclin E1                                                  | 134.8587                  | 239.6956                 | 0.5626248 |
| cyclin F                                                   | 66.79519                  | 120.1149                 | 0.5560941 |
| cyclin D-type binding-protein 1                            | 163.2991                  | 306.0949                 | 0.5334917 |
| cyclin-dependent kinase 14                                 | 42.20995                  | 86.80894                 | 0.4862397 |

**Figure S3.** Gene profile analysis showed us that some of cell-cycle associated molecules were down-regulated comparing the samples of 2 weeks after treatment with those of pre-treatment among three patients.

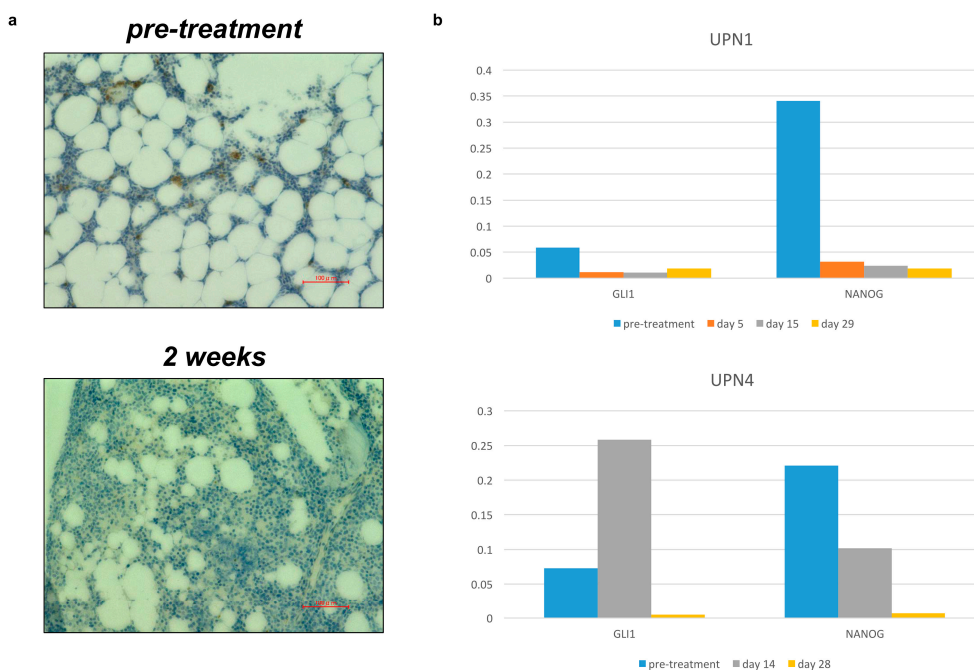

**Figure S4.** Immunostaining of patients' bone marrow samples with NANOG antibody. The proportions of stained area decreased during treatment with PF-913. Scale bar indicates 10  $\mu$ m.

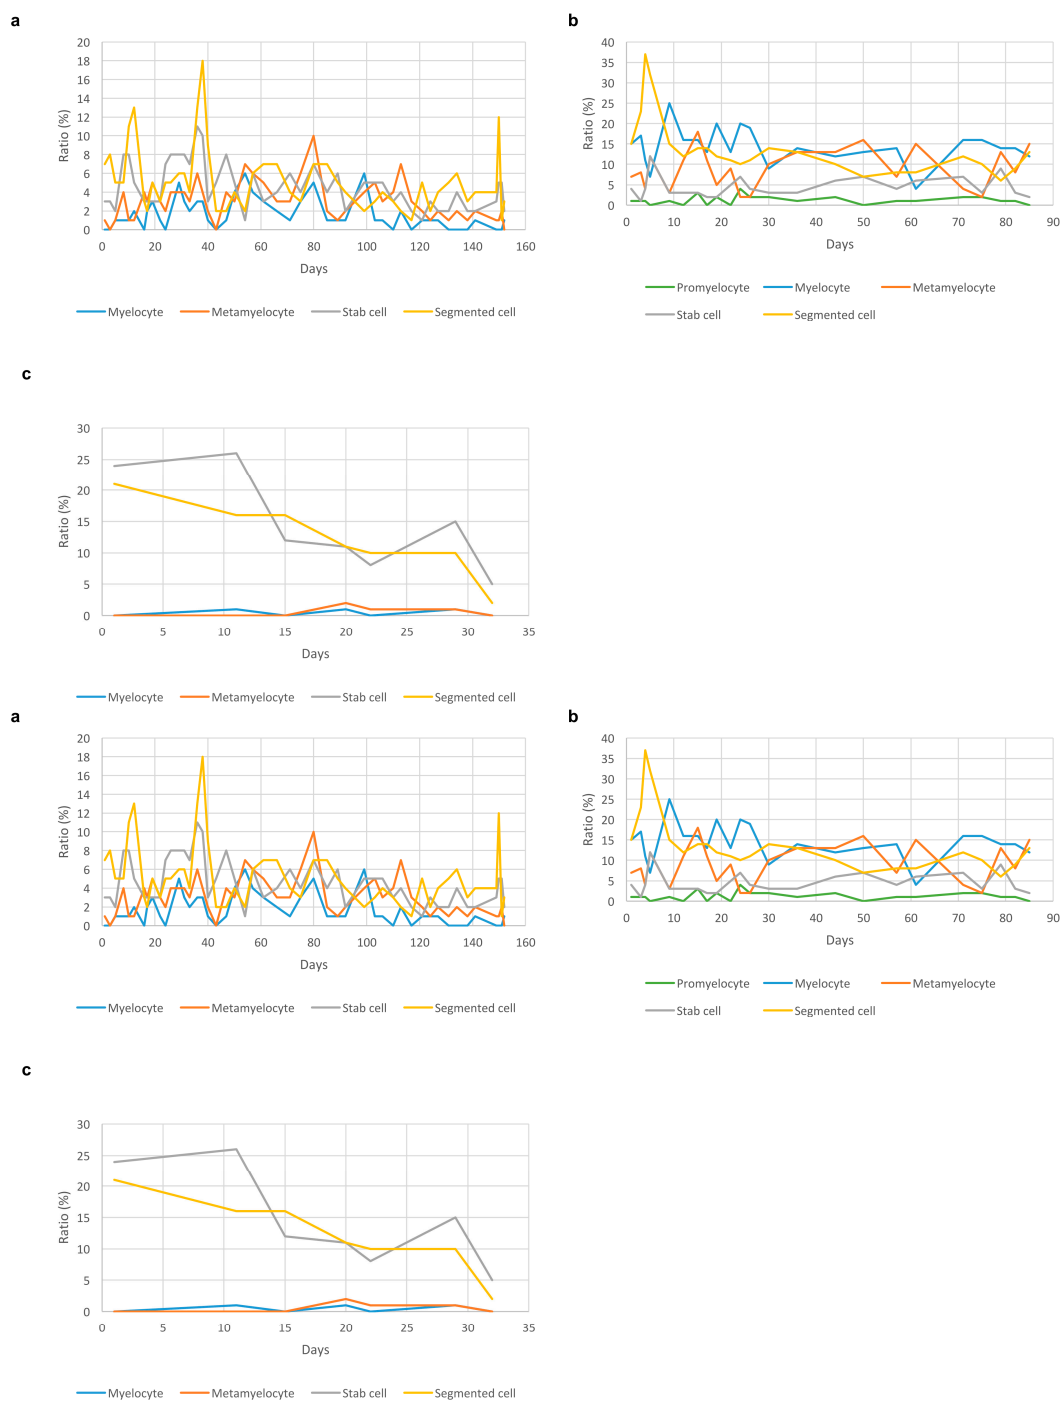

**Figure S5.** WBC data during treatment with PF-913. The transitions of white blood cell differentiation in three patients.
